# Supplementary material
Source: publisher figshare collection journal article supplement (https://sage.figshare.com/ndownloader/files/27362428)
Supplement: Supplementary file 1 [file 27362428]

## Sheet: RANDOMIZED ROB
Author, Year, Title	1.2. Was the allocation sequence concealed until participants were recruited and assigned to interventions?	1.1. Was the allocation sequence random?	1.3. Were there baseline imbalances that suggest a problem with randomization?	DOMAIN 1 R.O.B	Is your aim for this study to...?	2.1.A. Were participants aware of their assigned intervention during the trial?	2.2.A. Were carers and trial personnel aware of participants' assigned intervention during the trial?	2.3.A. Were there deviations from the intended intervention beyond what would be expected in usual practice?	2.4.A. Were these deviations from intended intervention unbalanced between groups and likely to have affected the outcome?	2.5.A. Were any participants analyzed in a group different from the one to which they were assigned?	2.6.A. Was there potential for a substantial impact (on the estimated effect of intervention) of analyzing participants in the wrong group? Were participants aware of their assigned intervention during the trial?	2.1.B. Were participants aware of their assigned intervention during the trial?	2.2.B. Were carers and trial personnel aware of participants assigned intervention during the trial?	2.3.B. Were important co-interventions balanced across intervention groups?	2.4.B. Was the intervention implemented successfully?	2.5.B. Did Study participants adhere to the assigned intervention regimen?	2.6.B. Was an appropriate analysis used to estimate the effect of starting and adhering to the intervention?	DOMAIN 2 R.O.B	3.1. Were outcome data available for all, or nearly all, participants randomized?	3.3. Is there evidence that results were robust to the presence of missing outcome data?	3.2. Are the proportions of missing outcome data and reasons for missing outcome data similar across intervention groups?	DOMAIN 3 R.O.B	4.1. Were outcome assessors aware of the intervention received by study participants?	4.2. Was the assessment of the outcome likely to be influenced by knowledge of intervention received?	DOMAIN 4 R.O.B	5.1. Are there reported outcome data likely to have been selected, on the basis of the results from multiple outcome measurements (e.g. scales, definitions, time points) within the outcome domain?	5.2. Are there reported outcome data likely to have been selected, on the basis of the results from multiple analyses of the data?	DOMAIN 5 R.O.B	OVERALL RISK
Arriens et al 2015	Y	Y	PN	LOW RISK	A. assess the effect of assignment to intervention	N	N			N								LOW RISK	N	Y	Y	LOW RISK	Y	PN	LOW RISK	N	PN	LOW RISK	LOW RISK
Abrahao et al 2016, Cardiovascular training vs. resistance training for improving quality of life and physical function in patients with systemic lupus erythematosus: a randomized controlled trial	PY	Y	N	LOW RISK	A. assess the effect of assignment to intervention	PN	PY	PN		N								LOW RISK	Y			LOW RISK	PY	N	LOW RISK	N	N	LOW RISK	LOW RISK
Austin et al 1996, Health Outcome Improvements in Patients with Systemic Lupus Erythematosus Using Two Telephone Counseling Interventions	PY	Y	N	LOW RISK	A. assess the effect of assignment to intervention	PN	Y	PN		N								LOW RISK	Y			LOW RISK	N		LOW RISK	N	PN	LOW RISK	LOW RISK
Bostrom et al 2016, Effects of a one-year physical activity programme for women with systemic lupus erythematosus – a randomized controlled study	Y	Y	N	LOW RISK	A. assess the effect of assignment to intervention	PN	Y	N		N								LOW RISK	N	PY	N	LOW RISK	N		LOW RISK	PN	N	LOW RISK	LOW RISK
Conceicao et al 2019, Psychoanalytic psychotherapy improves quality of life, depression, anxiety and coping in patients with systemic lupus erythematosus: a controlled randomized clinical trial	Y	Y	PN	LOW RISK	A. assess the effect of assignment to intervention	PY		N		PN								LOW RISK	Y			LOW RISK	N		LOW RISK	PN	N	LOW RISK	LOW RISK
Dobkin et al 2002, Counterbalancing Patient Demands With Evidence: Results From a Pan-Canadian Randomized Clinical Trial of Brief Supportive–Expressive Group Psychotherapy for Women With Systemic Lupus Erythematosus	Y	Y	N	LOW RISK	A. assess the effect of assignment to intervention	PY		PN		N								LOW RISK	N	N	Y	LOW RISK	Y	PN	LOW RISK	PN	N	LOW RISK	LOW RISK
Edworthy et al 2003, Group psychotherapy reduces illness intrusiveness in systemic lupus erythematosus	PY	Y	N	LOW RISK	A. assess the effect of assignment to intervention	PY		PN		PN								LOW RISK	NI	PN	NI	SOME CONCERNS	NI	PN	LOW RISK	N	PN	LOW RISK	LOW RISK
Daltroy et al 1995, Effectiveness of Minimally Supervised Home Aerobic Training in Patients With Systemic Rheumatic Disease	Y	PY	Y	LOW RISK	A. assess the effect of assignment to intervention	No	NI	N		N								LOW RISK	N	PN	N	HIGH RISK	PY	PN	LOW RISK	N	N	LOW RISK	HIGH RISK
Greco et al 2004, Effects of a Stress-Reduction Program on Psychological Function, Pain, and Physical Function of Systemic Lupus Erythematosus Patients: A Randomized Controlled Trial	PY	Y	N	LOW RISK	A. assess the effect of assignment to intervention	PN	PN			N								LOW RISK	N	Y	Y	LOW RISK	N		LOW RISK	N	PN	LOW RISK	LOW RISK
Karlson et al 2014, A Randomized Clinical Trial of a Psychoeducational Intervention to Improve Outcomes in Systemic Lupus Erythematosus	Y	Y	NI	LOW RISK	A. assess the effect of assignment to intervention	PN	Y	N		N								LOW RISK	N	Y	PY	LOW RISK	N		LOW RISK	N	PN	LOW RISK	LOW RISK
Maisiak et al 1996, The Effect of Person-Centered Counseling on the Psychological Status of Persons with Systemic Lupus Erythematosus or Rheumatoid Arthrr' tiS	Y	Y	PN	LOW RISK	A. assess the effect of assignment to intervention	No	N			N								LOW RISK	Y			LOW RISK	N		LOW RISK	N	N	LOW RISK	LOW RISK
Navarrete-Navarrete et 2010, Quality-of-life predictor factors in patients with SLE and their modification after cognitive behavioural therapy	NI	Y	N	LOW RISK	A. assess the effect of assignment to intervention	PN	NI	N		N								LOW RISK	Y			LOW RISK	NI	PN	LOW RISK	PN	NI	SOME CONCERNS	LOW RISK
Navarrete-Navarrete et 2010, Efficacy of Cognitive Behavioural Therapy for the Treatment of Chronic Stress in Patients with Lupus Erythematosus: A Randomized Controlled Trial	PY	Y	N	LOW RISK	A. assess the effect of assignment to intervention	PN	NI	N		N								LOW RISK	PY			LOW RISK	NI	PN	LOW RISK	N	N	LOW RISK	LOW RISK
Robb-Nicholson et al 1989, Effects of Aerobic Conditioning in Lupus Fatigue: A Pilot Study	PY	Y	Y	SOME CONCERNS	A. assess the effect of assignment to intervention	PN	PY	PN		N								LOW RISK	N	N	N	HIGH RISK	N		LOW RISK	N	PN	LOW RISK	HIGH RISK
Shah et al 2002, Effect of a Culturally Sensitive Cholesterol Lowering Diet Program on Lipid and Lipoproteins, Body Weight, Nutrient Intakes, and Quality of Life in Patients with Systemic Lupus Erythematosus	PY	Y	N	LOW RISK	A. assess the effect of assignment to intervention	NI		PN		N								LOW RISK	Y			LOW RISK	PY	PN	LOW RISK	N	N	LOW RISK	LOW RISK
Solati et al 2017, The Effectiveness of Mindfulness-based Cognitive Therapy on Psychological Symptoms and Quality of Life in Systemic Lupus Erythematosus Patients: A Randomized Controlled Trial	Y	Y	N	LOW RISK	A. assess the effect of assignment to intervention	No	PY	PN		N								LOW RISK	Y			LOW RISK	Y	PY	HIGH RISK	N	N	LOW RISK	HIGH RISK
Tench et al 2003, Fatigue in systemic lupus erythematosus: a randomized controlled trial of exercise	PY	Y	N	LOW RISK	A. assess the effect of assignment to intervention	PN	PY	NI		N								SOME CONCERNS	N	NI	Y	LOW RISK	NI	PN	LOW RISK	N	N	LOW RISK	LOW RISK
Wu et al 2018, Effects of physical activity counselling in women with systemic lupus erythematosus: A randomized controlled trial	Y	Y	N	LOW RISK	A. assess the effect of assignment to intervention	PN	PY	PN		N								LOW RISK	N	PN	PY	LOW RISK	N		LOW RISK	N	PY	HIGH RISK	HIGH RISK
Bogdanovic et al 2015, Physical Activity Program Is Helpful for Improving Quality of Life in Patients with Systemic Lupus Erythematosus	PY	NI	PN	SOME CONCERNS	A. assess the effect of assignment to intervention	NI		NI		N								SOME CONCERNS	Y			LOW RISK	PY	N	LOW RISK	N	NI	SOME CONCERNS	HIGH RISK
Carvalho et al 2005, Effects of supervised cardiovascular training program on exercise tolerance, aerobic capacity, and quality of life in patients with systemic lupus erythematosus.	PY	NI	PN	SOME CONCERNS	A. assess the effect of assignment to intervention	PN	PY	N		N								LOW RISK	N	NI	PN	HIGH RISK	N	N	LOW RISK	N	PN	LOW RISK	HIGH RISK
Sahebari 2019, Efficacy of Acceptance and Commitment Therapy in Reducing Disappointment, Psychological Distress, and Psychasthenia among Systemic Lupus Erythematosus (SLE) Patients.	PY	Y	N	LOW RISK	A. assess the effect of assignment to intervention	PN	PY	NI		PN								SOME CONCERNS	Y			LOW RISK	NI	PN	LOW RISK	N	N	LOW RISK	LOW RISK

## Sheet: NON RANDOMIZED ROB
Author, Year, Title	1.1. Is there potential for confounding of the effect of intervention in this study?	1.2. Was the analysis based on splitting participants' follow up time according to intervention received?	1.3. Were intervention discontinuations or switches likely to be related to factors that are prognostic for the outcome?	1.4. Did the authors use an appropriate analysis method that controlled for all the important confounding domains?	1.5. Were confounding domains that were controlled for measured validly and reliably by the variables available in this study?	1.6. Did the authors control for any post-intervention variables that could have been affected by the intervention?	1.7. Did the authors use an appropriate analysis method that adjusted for all the important confounding domains and for time-varying confounding?	1.8. Were confounding domains that were adjusted for measured validly and reliably by the variables available in this study?	DOMAIN 1	2.1. Was selection of participants into the study (or into the analysis) based on participant characteristics observed after the start of intervention?	2.2. Were the post-intervention variables that influenced selection likely to be associated with intervention?	2.3. Were the post-intervention variables that influenced selection likely to be influenced by the outcome or a cause of the outcome?	2.4. Do start of follow-up and start of intervention coincide for most participants	2.5. Were adjustment techniques used that are likely to correct for presence of selection biases?	DOMAIN 2	3.1. Were intervention groups clearly defined?	3.2. Was the information used to define intervention groups recorded at the start of the intervention?	3.3. Could classification of intervention status have been affected by knowledge of the outcome or risk of the outcome?	Is the aim of this study to...	DOMAIN 3	4.1.A. Were there deviations from the intended intervention beyond what would be expected in usual practice?	4.2.A. Were these deviations from intended intervention unbalanced between groups and likely to have affected the outcome?	4.3.B. Were important co-interventions balanced across intervention groups?	4.4.B. Was the intervention implemented successfully for most participants?	4.5.B. Did study participants adhere to the assigned intervention regimen?	4.6.B. Was an appropriate analysis used to estimate the effect of starting and adhering to the intervention?	DOMAIN 4	5.1. Were outcome data available for all, or nearly all, participants?	5.2. Were participants excluded due to missing data on intervention status?	5.3. Were participants excluded due to missing data on other variables needed for the analysis?	5.4. Are the proportion of participants and reasons for missing data similar across interventions?	5.5. Is there evidence that results were robust to the presence of missing data?	DOMAIN 5	6.1. Could the outcome measure have been influenced by knowledge of the intervention received?	6.2. Were outcome assessors aware of the intervention received by study participants?	6.3. Were the methods of outcome assessment comparable across intervention groups?	6.4. Were any systematic errors in measurement of the outcome related to intervention received?	DOMAIN 6	7.1. Is the reported effect estimate likely to be selected on the basis of the results from multiple outcome measurements within the outcome domain?	7.2. Is the reported effect estimate likely to be selected on the basis of the results from multiple analyses of the intervention-outcome relationship?	7.3. Is the reported effect estimate likely to be selected on the basis of the results from different subgroups?	DOMAIN 7	OVERALL RISK
Jolly et al 2014, Body Image Intervention to Improve Health Outcomes in Lupus: A Pilot Study	Probably Yes	Yes	No	Yes	Yes	Probably No			MODERATE RISK	No			Probably Yes	Probably Yes	LOW RISK	Yes	Yes	Probably No	A. assess the effect of assignment to intervention.	LOW RISK	Probably Yes	Probably Yes					LOW RISK	Probably No	Probably Yes	Probably Yes	No	Probably Yes	SERIOUS RISK	Probably No	Probably No	Yes	Probably No	LOW RISK	No	Probably Yes	No	SERIOUS RISK	SERIOUS RISK
Sohng et al 2003, Effects of a self-management course for patients with systemic lupus erythematosus	Probably Yes	Yes	Probably No	Yes	Yes	Probably No			MODERATE RISK	Yes	Probably No	N/A	No	Yes	MODERATE RISK	Yes	Yes	Probably No	A. assess the effect of assignment to intervention.	LOW RISK	Probably Yes	Yes					LOW RISK	No	No	No	Yes	Probably No	LOW RISK	Probably No	No	Yes	No	LOW RISK	No	No	No	LOW RISK	SERIOUS RISK
